# Supplementary material for: Why there is no evidence that pyridine killed the English crabs
Source: Royal Society of Chemistry journal article supplement (doi:10.1039/d4va00006d), 2024-01-01
Supplement: d4va00006d1.xlsx [file d4va00006d1.xlsx]

## Sheet: ECOTOX Explore Data Detail (1)
CAS No.	Chemical Name	Species Group	Species Name	Common Name	Effect	Measurement	Endpoint	Dur (Std)	Conc. Type	Conc. Mean (Std)	Conc. Units (Std)	Pub. Year	Citation
110861	Pyridin	Annelida	Tubifex tubifex	Tubificid Worm	Mortality	Mortality	LC50	21	Active ingredient	4.27	AI mg/L	2008	Singh,B.B., R. Chandra, and Y.K. Sharma. Effect of Pyridine and Formaldehyde on a Macrophyte (Lemna minor L.) and a Sludge Worm (Tubifex tubifex Muller) in Fresh Water Microcosms. Appl. Ecol. Environ. Res.6(2): 21-35, 2008. ECOREF #189541
110861	Pyridin	Annelida	Tubifex tubifex	Tubificid Worm	Mortality	Mortality	LC50	14	Active ingredient	6.25	AI mg/L	2008	Singh,B.B., R. Chandra, and Y.K. Sharma. Effect of Pyridine and Formaldehyde on a Macrophyte (Lemna minor L.) and a Sludge Worm (Tubifex tubifex Muller) in Fresh Water Microcosms. Appl. Ecol. Environ. Res.6(2): 21-35, 2008. ECOREF #189541
110861	Pyridin	Annelida	Tubifex tubifex	Tubificid Worm	Mortality	Mortality	LC50	7	Active ingredient	12.84	AI mg/L	2008	Singh,B.B., R. Chandra, and Y.K. Sharma. Effect of Pyridine and Formaldehyde on a Macrophyte (Lemna minor L.) and a Sludge Worm (Tubifex tubifex Muller) in Fresh Water Microcosms. Appl. Ecol. Environ. Res.6(2): 21-35, 2008. ECOREF #189541
110861	Pyridin	Fish	Cyprinus carpio	Common Carp	Mortality	Mortality	LC50	4	Active ingredient	26	AI mg/L	1975	Rao,T.S., M.S. Rao, and S.B.S.K. Prasad. Median Tolerance Limits of Some Chemicals to the Fresh Water Fish "Cyprinus carpio". Indian J. Environ. Health17(2): 140-146, 1975. ECOREF #2077
110861	Pyridin	Insecta	Corixa punctata	Water Boatman	Mortality	Mortality	LC50	2	Active ingredient	30	AI mg/L	1983	Slooff,W. Benthic Macroinvertebrates and Water Quality Assessment: Some Toxicological Considerations. Aquat. Toxicol.4:73-82, 1983. ECOREF #15788
110861	Pyridin	Fish	Cyprinus carpio	Common Carp	Mortality	Mortality	LC50	2	Active ingredient	35	AI mg/L	1975	Rao,T.S., M.S. Rao, and S.B.S.K. Prasad. Median Tolerance Limits of Some Chemicals to the Fresh Water Fish "Cyprinus carpio". Indian J. Environ. Health17(2): 140-146, 1975. ECOREF #2077
110861	Pyridin	Fish	Cyprinus carpio	Common Carp	Mortality	Mortality	LC50	1	Active ingredient	47.5	AI mg/L	1975	Rao,T.S., M.S. Rao, and S.B.S.K. Prasad. Median Tolerance Limits of Some Chemicals to the Fresh Water Fish "Cyprinus carpio". Indian J. Environ. Health17(2): 140-146, 1975. ECOREF #2077
110861	Pyridin	Crustacean	Crangon septemspinosa	Bay Shrimp, Sand Shrimp	Mortality	Mortality	LC50	4	Active ingredient	50	AI mg/L	1979	McLeese,D.W., V. Zitko, and M.R. Peterson. Structure-Lethality Relationships for Phenols, Anilines and Other Aromatic Compounds in Shrimp and Clams. Chemosphere8(2): 53-57, 1979. ECOREF #5810
110861	Pyridin	Insecta	Culex pipiens	Northern House Mosquito	Mortality	Mortality	LC50	2	Active ingredient	66	AI mg/L	1983	Slooff,W., J.H. Canton, and J.L.M. Hermens. Comparison of the Susceptibility of 22 Freshwater Species to 15 Chemical Compounds. I. (Sub)Acute Toxicity Tests. Aquat. Toxicol.4(2): 113-128, 1983. ECOREF #10574
110861	Pyridin	Fish	Pimephales promelas	Fathead Minnow	Mortality	Mortality	LC50	4	Active ingredient	68.3	AI mg/L	1987	Brooke,L. Report of the Flow-Through and Static Acute Test Comparisons with Fathead Minnows and Acute Tests with an Amphipod and a Cladoceran. Memo to L.Larson, Center for Lake Superior Environmental Studies dated August 31:24 p., 1987. ECOREF #14339
110861	Pyridin	Fish	Pimephales promelas	Fathead Minnow	Mortality	Mortality	LC50	4	Active ingredient	93.8	AI mg/L	1986	Geiger,D.L., S.H. Poirier, L.T. Brooke, and D.J. Call. Acute Toxicities of Organic Chemicals to Fathead Minnows (Pimephales promelas) Volume III. Center for Lake Superior Environmental Studies, University of Wisconsin, Superior, WI:328 p., 1986. ECOREF #12858
110861	Pyridin	Fish	Pimephales promelas	Fathead Minnow	Mortality	Mortality	LC50	4	Active ingredient	99	AI mg/L	1995	Broderius,S.J., M.D. Kahl, and M.D. Hoglund. Use of Joint Toxic Response to Define the Primary Mode of Toxic Action for Diverse Industrial Organic Chemicals. Environ. Toxicol. Chem.14(9): 1591-1605, 1995. ECOREF #15031
110861	Pyridin	Crustacean	Americamysis bahia	Opossum Shrimp	Mortality	Mortality	LC50	4	Active ingredient	100	AI mg/L	1987	Carr,S. Saltwater Toxicity Test Data for FY '87 Advisory Chemicals. Memo from S.Carr of Battelle Ocean Sciences to F.Gostomski of USEPA with Attached Test Protocol and 14 Toxicity Test Reports:83 p., 1987. ECOREF #155283
110861	Pyridin	Fish	Pimephales promelas	Fathead Minnow	Mortality	Mortality	LC50	4	Active ingredient	106	AI mg/L	1986	Geiger,D.L., S.H. Poirier, L.T. Brooke, and D.J. Call. Acute Toxicities of Organic Chemicals to Fathead Minnows (Pimephales promelas) Volume III. Center for Lake Superior Environmental Studies, University of Wisconsin, Superior, WI:328 p., 1986. ECOREF #12858
110861	Pyridin	Fish	Pimephales promelas	Fathead Minnow	Mortality	Mortality	LC50	2	Active ingredient	115	AI mg/L	1983	Slooff,W., J.H. Canton, and J.L.M. Hermens. Comparison of the Susceptibility of 22 Freshwater Species to 15 Chemical Compounds. I. (Sub)Acute Toxicity Tests. Aquat. Toxicol.4(2): 113-128, 1983. ECOREF #10574
110861	Pyridin	Fish	Pimephales promelas	Fathead Minnow	Mortality	Mortality	LC50	2	Formulation	115	AI mg/L	1982	Slooff,W. A Comparative Study on the Short-Term Effects of 15 Chemicals on Fresh Water Organisms of Different Tropic Levels. Natl.Tech.Inf.Serv., Springfield, VA:25 p., 1982. ECOREF #14863
110861	Pyridin	Insecta	Aedes aegypti	Yellow Fever Mosquito	Mortality	Mortality	LC50	2	Active ingredient	130	AI mg/L	1983	Slooff,W., J.H. Canton, and J.L.M. Hermens. Comparison of the Susceptibility of 22 Freshwater Species to 15 Chemical Compounds. I. (Sub)Acute Toxicity Tests. Aquat. Toxicol.4(2): 113-128, 1983. ECOREF #10574
110861	Pyridin	Insecta	Aedes aegypti	Yellow Fever Mosquito	Mortality	Mortality	LC50	2	Formulation	130	AI mg/L	1982	Slooff,W. A Comparative Study on the Short-Term Effects of 15 Chemicals on Fresh Water Organisms of Different Tropic Levels. Natl.Tech.Inf.Serv., Springfield, VA:25 p., 1982. ECOREF #14863
110861	Pyridin	Insecta	Cloeon dipterum	Mayfly	Mortality	Mortality	LC50	2	Active ingredient	165	AI mg/L	1983	Slooff,W. Benthic Macroinvertebrates and Water Quality Assessment: Some Toxicological Considerations. Aquat. Toxicol.4:73-82, 1983. ECOREF #15788
110861	Pyridin	Crustacean	Gammarus pulex	Scud	Mortality	Mortality	LC50	2	Active ingredient	182	AI mg/L	1983	Slooff,W. Benthic Macroinvertebrates and Water Quality Assessment: Some Toxicological Considerations. Aquat. Toxicol.4:73-82, 1983. ECOREF #15788
110861	Pyridin	Insecta	Asellus aquaticus	Aquatic Sowbug	Mortality	Mortality	LC50	2	Active ingredient	220	AI mg/L	1983	Slooff,W. Benthic Macroinvertebrates and Water Quality Assessment: Some Toxicological Considerations. Aquat. Toxicol.4:73-82, 1983. ECOREF #15788
110861	Pyridin	Fish	Leuciscus idus ssp. melanotus	Carp	Mortality	Mortality	LC50	2	Formulation	225	AI mg/L	1978	Juhnke,I., and D. Luedemann. Results of the Investigation of 200 Chemical Compounds for Acute Fish Toxicity with the Golden Orfe Test (Ergebnisse der Untersuchung von 200 Chemischen Verbindungen auf Akute Fischtoxizitat mit dem Goldorfentest). Z. Wasser-Abwasser-Forsch.11(5): 161-164, 1978. ECOREF #547
110861	Pyridin	Insecta	Chironomus riparius	Midge	Mortality	Mortality	LC50	2	Active ingredient	229	AI mg/L	1983	Slooff,W. Benthic Macroinvertebrates and Water Quality Assessment: Some Toxicological Considerations. Aquat. Toxicol.4:73-82, 1983. ECOREF #15788
110861	Pyridin	Crustacean	Americamysis bahia	Opossum Shrimp	Mortality	Mortality	LC50	4	Active ingredient	232.38	AI mg/L	1987	Carr,R.S. Total Organic Carbon (TOC) Data for Battelle Duxbury Seawater. July 21 Memo to Michael DeGraeve, Battelle Columbus Laboratories, Columbus,OH:71 p., 1987. ECOREF #17308
110861	Pyridin	Crustacean	Americamysis bahia	Opossum Shrimp	Mortality	Mortality	LC50	4	Active ingredient	234	AI mg/L	1987	Carr,S. Saltwater Toxicity Test Data for FY '87 Advisory Chemicals. Memo from S.Carr of Battelle Ocean Sciences to F.Gostomski of USEPA with Attached Test Protocol and 14 Toxicity Test Reports:83 p., 1987. ECOREF #155283
110861	Pyridin	Fish	Leuciscus idus ssp. melanotus	Carp	Mortality	Mortality	LC50	2	Formulation	240	AI mg/L	1978	Juhnke,I., and D. Luedemann. Results of the Investigation of 200 Chemical Compounds for Acute Fish Toxicity with the Golden Orfe Test (Ergebnisse der Untersuchung von 200 Chemischen Verbindungen auf Akute Fischtoxizitat mit dem Goldorfentest). Z. Wasser-Abwasser-Forsch.11(5): 161-164, 1978. ECOREF #547
110861	Pyridin	Crustacean	Daphnia magna	Water Flea	Intoxication	Immobile	LC50	1	Formulation	240	AI mg/L	1977	Bringmann,G., and R. Kuhn. Results of the Damaging Effect of Water Pollutants on Daphnia magna (Befunde der Schadwirkung Wassergefahrdender Stoffe Gegen Daphnia magna). TR-79-1204, Literature Research Company, Annandale, VA:26 p., 1977. ECOREF #5718
110861	Pyridin	Insecta	Nemoura cinerea	Stonefly	Mortality	Mortality	LC50	2	Active ingredient	254	AI mg/L	1983	Slooff,W. Benthic Macroinvertebrates and Water Quality Assessment: Some Toxicological Considerations. Aquat. Toxicol.4:73-82, 1983. ECOREF #15788
110861	Pyridin	Fish	Pimephales promelas	Fathead Minnow	Mortality	Mortality	LC50	1	Formulation	320	AI mg/L	1982	Slooff,W. A Comparative Study on the Short-Term Effects of 15 Chemicals on Fresh Water Organisms of Different Tropic Levels. Natl.Tech.Inf.Serv., Springfield, VA:25 p., 1982. ECOREF #14863
110861	Pyridin	Fish	Oryzias latipes	Japanese Medaka	Mortality	Mortality	LC50	2	Active ingredient	330	AI mg/L	1982	Tonogai,Y., S. Ogawa, Y. Ito, and M. Iwaida. Actual Survey on TLM (Median Tolerance Limit) Values of Environmental Pollutants, Especially on Amines, Nitriles, Aromatic Nitrogen Compounds. J. Toxicol. Sci.7(3): 193-203, 1982. ECOREF #10132
110861	Pyridin	Mollusca	Lymnaea stagnalis	Great Pond Snail	Mortality	Mortality	LC50	2	Active ingredient	350	AI mg/L	1983	Slooff,W., J.H. Canton, and J.L.M. Hermens. Comparison of the Susceptibility of 22 Freshwater Species to 15 Chemical Compounds. I. (Sub)Acute Toxicity Tests. Aquat. Toxicol.4(2): 113-128, 1983. ECOREF #10574
110861	Pyridin	Mollusca	Lymnaea stagnalis	Great Pond Snail	Mortality	Mortality	LC50	2	Formulation	350	AI mg/L	1982	Slooff,W. A Comparative Study on the Short-Term Effects of 15 Chemicals on Fresh Water Organisms of Different Tropic Levels. Natl.Tech.Inf.Serv., Springfield, VA:25 p., 1982. ECOREF #14863
110861	Pyridin	Mollusca	Lymnaea stagnalis	Great Pond Snail	Mortality	Mortality	LC50	2	Active ingredient	350	AI mg/L	1983	Slooff,W. Benthic Macroinvertebrates and Water Quality Assessment: Some Toxicological Considerations. Aquat. Toxicol.4:73-82, 1983. ECOREF #15788
110861	Pyridin	Fish	Oryzias latipes	Japanese Medaka	Mortality	Mortality	LC50	1	Active ingredient	400	AI mg/L	1982	Tonogai,Y., S. Ogawa, Y. Ito, and M. Iwaida. Actual Survey on TLM (Median Tolerance Limit) Values of Environmental Pollutants, Especially on Amines, Nitriles, Aromatic Nitrogen Compounds. J. Toxicol. Sci.7(3): 193-203, 1982. ECOREF #10132
110861	Pyridin	Insecta	Ischnura elegans	Damselfly	Mortality	Mortality	LC50	2	Active ingredient	410	AI mg/L	1983	Slooff,W. Benthic Macroinvertebrates and Water Quality Assessment: Some Toxicological Considerations. Aquat. Toxicol.4:73-82, 1983. ECOREF #15788
110861	Pyridin	Fish	Leuciscus idus	Ide, Silver Or Golden Orfe	Mortality	Mortality	LC50	4	Formulation	512	AI mg/L	1982	Wellens,H. Comparison of the Sensitivity of Brachydanio rerio and Leuciscus idus by Testing the Fish Toxicity of Chemicals and Wastewaters. Z. Wasser-Abwasser-Forsch.51(2): 49-52, 1982. ECOREF #11037
110861	Pyridin	Fish	Danio rerio	Zebra Danio	Mortality	Mortality	LC50	4	Formulation	512	AI mg/L	1982	Wellens,H. Comparison of the Sensitivity of Brachydanio rerio and Leuciscus idus by Testing the Fish Toxicity of Chemicals and Wastewaters. Z. Wasser-Abwasser-Forsch.51(2): 49-52, 1982. ECOREF #11037
110861	Pyridin	Crustacean	Daphnia pulex	Water Flea	Mortality	Mortality	LC50	2	Formulation	520	AI mg/L	1978	Canton,J.H., and D.M.M. Adema. Reproducibility of Short-Term and Reproduction Toxicity Experiments with Daphnia magna and Comparison of the Sensitivity of Daphnia magna with Daphnia pulex and Daphnia cucullata in Short-Term Experiments. Hydrobiologia59(2): 135-140, 1978. ECOREF #2017
110861	Pyridin	Fish	Oncorhynchus mykiss	Rainbow Trout	Mortality	Mortality	LC50	2	Active ingredient	560	AI mg/L	1983	Slooff,W., J.H. Canton, and J.L.M. Hermens. Comparison of the Susceptibility of 22 Freshwater Species to 15 Chemical Compounds. I. (Sub)Acute Toxicity Tests. Aquat. Toxicol.4(2): 113-128, 1983. ECOREF #10574
110861	Pyridin	Crustacean	Daphnia pulex	Water Flea	Mortality	Mortality	LC50	2	Formulation	630	AI mg/L	1978	Canton,J.H., and D.M.M. Adema. Reproducibility of Short-Term and Reproduction Toxicity Experiments with Daphnia magna and Comparison of the Sensitivity of Daphnia magna with Daphnia pulex and Daphnia cucullata in Short-Term Experiments. Hydrobiologia59(2): 135-140, 1978. ECOREF #2017
110861	Pyridin	Crustacean	Daphnia magna	Water Flea	Mortality	Mortality	LC50	2	Formulation	944	AI mg/L	1965	Dowden,B.F., and H.J. Bennett. Toxicity of Selected Chemicals to Certain Animals. J. Water Pollut. Control Fed.37(9): 1308-1316, 1965. ECOREF #915
110861	Pyridin	Amphibia	Ambystoma mexicanum	Mexican Axolotl	Mortality	Mortality	LC50	2	Formulation	950	AI mg/L	1980	Slooff,W., and R. Baerselman. Comparison of the Usefulness of the Mexican Axolotl (Ambystoma mexicanum) and the Clawed Toad (Xenopus laevis) in Toxicological Bioassays. Bull. Environ. Contam. Toxicol.24(3): 439-443, 1980. ECOREF #9740
110861	Pyridin	Amphibia	Ambystoma mexicanum	Mexican Axolotl	Mortality	Mortality	LC50	2	Formulation	950	AI mg/L	1982	Slooff,W. A Comparative Study on the Short-Term Effects of 15 Chemicals on Fresh Water Organisms of Different Tropic Levels. Natl.Tech.Inf.Serv., Springfield, VA:25 p., 1982. ECOREF #14863
110861	Pyridin	Amphibia	Xenopus laevis	African Clawed Frog	Mortality	Mortality	LC50	5	Formulation	1000	AI mg/L	1981	Davis,K.R., T.W. Schultz, and J.N. Dumont. Toxic and Teratogenic Effects of Selected Aromatic Amines on Embryos of the Amphibian Xenopus laevis. Arch. Environ. Contam. Toxicol.10(3): 371-391, 1981. ECOREF #6325
110861	Pyridin	Amphibia	Xenopus laevis	African Clawed Frog	Mortality	Mortality	LC50	5	Formulation	1050	AI mg/L	1981	Davis,K.R., T.W. Schultz, and J.N. Dumont. Toxic and Teratogenic Effects of Selected Aromatic Amines on Embryos of the Amphibian Xenopus laevis. Arch. Environ. Contam. Toxicol.10(3): 371-391, 1981. ECOREF #6325
110861	Pyridin	Amphibia	Xenopus laevis	African Clawed Frog	Mortality	Mortality	LC50	4	Formulation	1090	AI mg/L	1981	Davis,K.R., T.W. Schultz, and J.N. Dumont. Toxic and Teratogenic Effects of Selected Aromatic Amines on Embryos of the Amphibian Xenopus laevis. Arch. Environ. Contam. Toxicol.10(3): 371-391, 1981. ECOREF #6325
110861	Pyridin	Crustacean	Daphnia magna	Water Flea	Mortality	Mortality	LC50	2	Formulation	1120	AI mg/L	1978	Canton,J.H., and D.M.M. Adema. Reproducibility of Short-Term and Reproduction Toxicity Experiments with Daphnia magna and Comparison of the Sensitivity of Daphnia magna with Daphnia pulex and Daphnia cucullata in Short-Term Experiments. Hydrobiologia59(2): 135-140, 1978. ECOREF #2017
110861	Pyridin	Crustacean	Daphnia magna	Water Flea	Mortality	Mortality	LC50	2	Formulation	1140	AI mg/L	1978	Canton,J.H., and D.M.M. Adema. Reproducibility of Short-Term and Reproduction Toxicity Experiments with Daphnia magna and Comparison of the Sensitivity of Daphnia magna with Daphnia pulex and Daphnia cucullata in Short-Term Experiments. Hydrobiologia59(2): 135-140, 1978. ECOREF #2017
110861	Pyridin	Hydrozoa	Hydra oligactis	Hydra	Mortality	Mortality	LC50	2	Active ingredient	1150	AI mg/L	1983	Slooff,W., J.H. Canton, and J.L.M. Hermens. Comparison of the Susceptibility of 22 Freshwater Species to 15 Chemical Compounds. I. (Sub)Acute Toxicity Tests. Aquat. Toxicol.4(2): 113-128, 1983. ECOREF #10574
110861	Pyridin	Hydrozoa	Hydra oligactis	Hydra	Mortality	Mortality	LC50	2	Active ingredient	1150	AI mg/L	1983	Slooff,W. Benthic Macroinvertebrates and Water Quality Assessment: Some Toxicological Considerations. Aquat. Toxicol.4:73-82, 1983. ECOREF #15788
110861	Pyridin	Amphibia	Xenopus laevis	African Clawed Frog	Mortality	Mortality	LC50	3	Formulation	1200	AI mg/L	1981	Davis,K.R., T.W. Schultz, and J.N. Dumont. Toxic and Teratogenic Effects of Selected Aromatic Amines on Embryos of the Amphibian Xenopus laevis. Arch. Environ. Contam. Toxicol.10(3): 371-391, 1981. ECOREF #6325
110861	Pyridin	Crustacean	Daphnia magna	Water Flea	Mortality	Mortality	LC50	2	Formulation	1210	AI mg/L	1978	Canton,J.H., and D.M.M. Adema. Reproducibility of Short-Term and Reproduction Toxicity Experiments with Daphnia magna and Comparison of the Sensitivity of Daphnia magna with Daphnia pulex and Daphnia cucullata in Short-Term Experiments. Hydrobiologia59(2): 135-140, 1978. ECOREF #2017
110861	Pyridin	Annelida	Tubificidae	Oligochaete Family	Mortality	Mortality	LC50	2	Active ingredient	1300	AI mg/L	1983	Slooff,W. Benthic Macroinvertebrates and Water Quality Assessment: Some Toxicological Considerations. Aquat. Toxicol.4:73-82, 1983. ECOREF #15788
110861	Pyridin	Fish	Gambusia affinis	Western Mosquitofish	Mortality	Mortality	LC50	4	Formulation	1300	AI mg/L	1957	Wallen,I.E., W.C. Greer, and R. Lasater. Toxicity to Gambusia affinis of Certain Pure Chemicals in Turbid Waters. Sewage Ind. Wastes29(6): 695-711, 1957. ECOREF #508
110861	Pyridin	Fish	Gambusia affinis	Western Mosquitofish	Mortality	Mortality	LC50	1	Formulation	1350	AI mg/L	1957	Wallen,I.E., W.C. Greer, and R. Lasater. Toxicity to Gambusia affinis of Certain Pure Chemicals in Turbid Waters. Sewage Ind. Wastes29(6): 695-711, 1957. ECOREF #508
110861	Pyridin	Fish	Gambusia affinis	Western Mosquitofish	Mortality	Mortality	LC50	2	Formulation	1350	AI mg/L	1957	Wallen,I.E., W.C. Greer, and R. Lasater. Toxicity to Gambusia affinis of Certain Pure Chemicals in Turbid Waters. Sewage Ind. Wastes29(6): 695-711, 1957. ECOREF #508
110861	Pyridin	Amphibia	Xenopus laevis	African Clawed Frog	Mortality	Mortality	LC50	2	Formulation	1400	AI mg/L	1980	Slooff,W., and R. Baerselman. Comparison of the Usefulness of the Mexican Axolotl (Ambystoma mexicanum) and the Clawed Toad (Xenopus laevis) in Toxicological Bioassays. Bull. Environ. Contam. Toxicol.24(3): 439-443, 1980. ECOREF #9740
110861	Pyridin	Amphibia	Xenopus laevis	African Clawed Frog	Mortality	Mortality	LC50	2	Formulation	1400	AI mg/L	1982	Slooff,W. A Comparative Study on the Short-Term Effects of 15 Chemicals on Fresh Water Organisms of Different Tropic Levels. Natl.Tech.Inf.Serv., Springfield, VA:25 p., 1982. ECOREF #14863
110861	Pyridin	Fish	Oryzias latipes	Japanese Medaka	Mortality	Mortality	LC50	2	Active ingredient	1560	AI mg/L	1983	Slooff,W., J.H. Canton, and J.L.M. Hermens. Comparison of the Susceptibility of 22 Freshwater Species to 15 Chemical Compounds. I. (Sub)Acute Toxicity Tests. Aquat. Toxicol.4(2): 113-128, 1983. ECOREF #10574
110861	Pyridin	Crustacean	Daphnia magna	Water Flea	Mortality	Mortality	LC50	2	Formulation	1570	AI mg/L	1978	Canton,J.H., and D.M.M. Adema. Reproducibility of Short-Term and Reproduction Toxicity Experiments with Daphnia magna and Comparison of the Sensitivity of Daphnia magna with Daphnia pulex and Daphnia cucullata in Short-Term Experiments. Hydrobiologia59(2): 135-140, 1978. ECOREF #2017
110861	Pyridin	Amphibia	Xenopus laevis	African Clawed Frog	Mortality	Mortality	LC50	2	Formulation	1590	AI mg/L	1981	Davis,K.R., T.W. Schultz, and J.N. Dumont. Toxic and Teratogenic Effects of Selected Aromatic Amines on Embryos of the Amphibian Xenopus laevis. Arch. Environ. Contam. Toxicol.10(3): 371-391, 1981. ECOREF #6325
110861	Pyridin	Amphibia	Xenopus laevis	African Clawed Frog	Mortality	Mortality	LC50	5	Formulation	1620	AI mg/L	1981	Davis,K.R., T.W. Schultz, and J.N. Dumont. Toxic and Teratogenic Effects of Selected Aromatic Amines on Embryos of the Amphibian Xenopus laevis. Arch. Environ. Contam. Toxicol.10(3): 371-391, 1981. ECOREF #6325
110861	Pyridin	Amphibia	Xenopus laevis	African Clawed Frog	Mortality	Mortality	LC50	1	Formulation	1660	AI mg/L	1981	Davis,K.R., T.W. Schultz, and J.N. Dumont. Toxic and Teratogenic Effects of Selected Aromatic Amines on Embryos of the Amphibian Xenopus laevis. Arch. Environ. Contam. Toxicol.10(3): 371-391, 1981. ECOREF #6325
110861	Pyridin	Amphibia	Xenopus laevis	African Clawed Frog	Mortality	Mortality	LC50	1	Formulation	1800	AI mg/L	1982	Slooff,W. A Comparative Study on the Short-Term Effects of 15 Chemicals on Fresh Water Organisms of Different Tropic Levels. Natl.Tech.Inf.Serv., Springfield, VA:25 p., 1982. ECOREF #14863
110861	Pyridin	Amphibia	Ambystoma mexicanum	Mexican Axolotl	Mortality	Mortality	LC50	1	Formulation	1800	AI mg/L	1982	Slooff,W. A Comparative Study on the Short-Term Effects of 15 Chemicals on Fresh Water Organisms of Different Tropic Levels. Natl.Tech.Inf.Serv., Springfield, VA:25 p., 1982. ECOREF #14863
110861	Pyridin	Annelida	Dugesia lugubris	Turbellarian Flatworm	Mortality	Mortality	LC50	2	Active ingredient	1900	AI mg/L	1983	Slooff,W. Benthic Macroinvertebrates and Water Quality Assessment: Some Toxicological Considerations. Aquat. Toxicol.4:73-82, 1983. ECOREF #15788
110861	Pyridin	Crustacean	Daphnia magna	Water Flea	Mortality	Mortality	LC50	2	Formulation	1940	AI mg/L	1978	Canton,J.H., and D.M.M. Adema. Reproducibility of Short-Term and Reproduction Toxicity Experiments with Daphnia magna and Comparison of the Sensitivity of Daphnia magna with Daphnia pulex and Daphnia cucullata in Short-Term Experiments. Hydrobiologia59(2): 135-140, 1978. ECOREF #2017
110861	Pyridin	Crustacean	Daphnia magna	Water Flea	Mortality	Mortality	LC50	1	Formulation	2114	AI mg/L	1965	Dowden,B.F., and H.J. Bennett. Toxicity of Selected Chemicals to Certain Animals. J. Water Pollut. Control Fed.37(9): 1308-1316, 1965. ECOREF #915
110861	Pyridin	Amphibia	Xenopus laevis	African Clawed Frog	Mortality	Mortality	LC50	3	Formulation	2340	AI mg/L	1981	Davis,K.R., T.W. Schultz, and J.N. Dumont. Toxic and Teratogenic Effects of Selected Aromatic Amines on Embryos of the Amphibian Xenopus laevis. Arch. Environ. Contam. Toxicol.10(3): 371-391, 1981. ECOREF #6325
110861	Pyridin	Crustacean	Daphnia cucullata	Water Flea	Mortality	Mortality	LC50	2	Formulation	2390	AI mg/L	1978	Canton,J.H., and D.M.M. Adema. Reproducibility of Short-Term and Reproduction Toxicity Experiments with Daphnia magna and Comparison of the Sensitivity of Daphnia magna with Daphnia pulex and Daphnia cucullata in Short-Term Experiments. Hydrobiologia59(2): 135-140, 1978. ECOREF #2017
110861	Pyridin	Annelida	Erpobdella octoculata	Leech	Mortality	Mortality	LC50	2	Active ingredient	2400	AI mg/L	1983	Slooff,W. Benthic Macroinvertebrates and Water Quality Assessment: Some Toxicological Considerations. Aquat. Toxicol.4:73-82, 1983. ECOREF #15788
110861	Pyridin	Amphibia	Xenopus laevis	African Clawed Frog	Mortality	Mortality	LC50	4	Formulation	2460	AI mg/L	1981	Davis,K.R., T.W. Schultz, and J.N. Dumont. Toxic and Teratogenic Effects of Selected Aromatic Amines on Embryos of the Amphibian Xenopus laevis. Arch. Environ. Contam. Toxicol.10(3): 371-391, 1981. ECOREF #6325
110861	Pyridin	Protozoa	Spirostomum ambiguum	Protozoa	Mortality	Mortality	LC50	2	Formulation	2547.07	AI mg/L	1999	Nalecz-Jawecki,G., and J. Sawicki. Spirotox - a New Tool for Testing the Toxicity of Volatile Compounds. Chemosphere38(14): 3211-3218, 1999. ECOREF #19880
110861	Pyridin	Crustacean	Daphnia cucullata	Water Flea	Mortality	Mortality	LC50	2	Formulation	2550	AI mg/L	1978	Canton,J.H., and D.M.M. Adema. Reproducibility of Short-Term and Reproduction Toxicity Experiments with Daphnia magna and Comparison of the Sensitivity of Daphnia magna with Daphnia pulex and Daphnia cucullata in Short-Term Experiments. Hydrobiologia59(2): 135-140, 1978. ECOREF #2017
110861	Pyridin	Amphibia	Xenopus laevis	African Clawed Frog	Mortality	Mortality	LC50	2	Formulation	2570	AI mg/L	1981	Davis,K.R., T.W. Schultz, and J.N. Dumont. Toxic and Teratogenic Effects of Selected Aromatic Amines on Embryos of the Amphibian Xenopus laevis. Arch. Environ. Contam. Toxicol.10(3): 371-391, 1981. ECOREF #6325
110861	Pyridin	Amphibia	Xenopus laevis	African Clawed Frog	Mortality	Mortality	LC50	3	Formulation	2820	AI mg/L	1981	Davis,K.R., T.W. Schultz, and J.N. Dumont. Toxic and Teratogenic Effects of Selected Aromatic Amines on Embryos of the Amphibian Xenopus laevis. Arch. Environ. Contam. Toxicol.10(3): 371-391, 1981. ECOREF #6325
110861	Pyridin	Protozoa	Spirostomum ambiguum	Protozoa	Mortality	Mortality	LC50	1	Formulation	3116.6	AI mg/L	1999	Nalecz-Jawecki,G., and J. Sawicki. Spirotox - a New Tool for Testing the Toxicity of Volatile Compounds. Chemosphere38(14): 3211-3218, 1999. ECOREF #19880
110861	Pyridin	Amphibia	Xenopus laevis	African Clawed Frog	Mortality	Mortality	LC50	2	Formulation	3390	AI mg/L	1981	Davis,K.R., T.W. Schultz, and J.N. Dumont. Toxic and Teratogenic Effects of Selected Aromatic Amines on Embryos of the Amphibian Xenopus laevis. Arch. Environ. Contam. Toxicol.10(3): 371-391, 1981. ECOREF #6325
110861	Pyridin	Amphibia	Xenopus laevis	African Clawed Frog	Mortality	Mortality	LC50	1	Formulation	3800	AI mg/L	1981	Davis,K.R., T.W. Schultz, and J.N. Dumont. Toxic and Teratogenic Effects of Selected Aromatic Amines on Embryos of the Amphibian Xenopus laevis. Arch. Environ. Contam. Toxicol.10(3): 371-391, 1981. ECOREF #6325
110861	Pyridin	Amphibia	Xenopus laevis	African Clawed Frog	Mortality	Mortality	LC50	1	Formulation	9550	AI mg/L	1981	Davis,K.R., T.W. Schultz, and J.N. Dumont. Toxic and Teratogenic Effects of Selected Aromatic Amines on Embryos of the Amphibian Xenopus laevis. Arch. Environ. Contam. Toxicol.10(3): 371-391, 1981. ECOREF #6325
